# Supplementary material for: Fluorescence detection of three types of pollutants based on fluorescence resonance energy transfer and its comparison with colorimetric detection
Source: PubMed Central journal article supplement — RSC Adv. 2023 Jul 21;13(32):22043–53. doi: 10.1039/d3ra02647g (PMC10359850; doi:10.1039/d3ra02647g), 2023-07-21
Supplement: RA-013-D3RA02647G-s001.pdf [file RA-013-D3RA02647G-s001.pdf]

## Fluorescence detection of three types of pollutants based on fluorescence resonance energy transfer and its comparison with colorimetric detection

Yifei Kong, Dan Liu, Xinran Guo, Xinyue Chen\*

School of Pharmacy, Lanzhou University, Lanzhou, 730000, P. R. China.

Supplementary date:

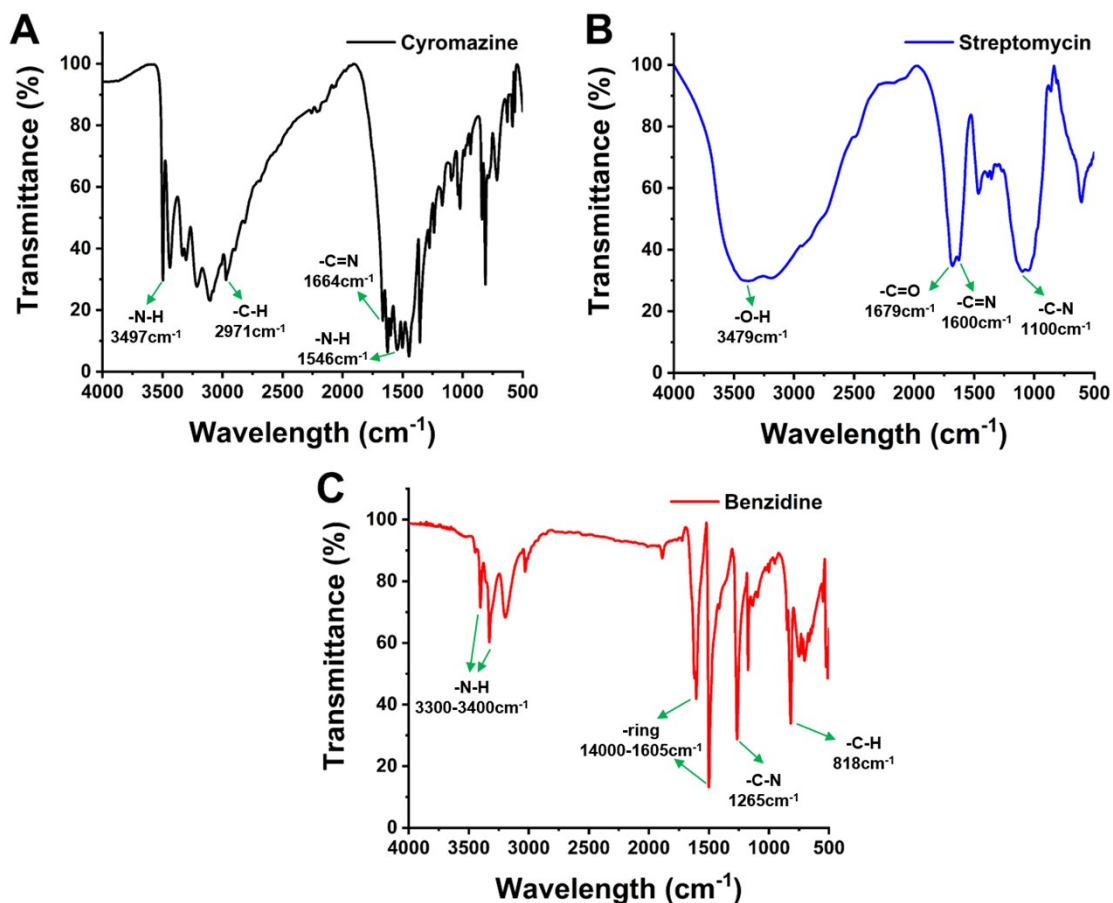

Figure S1. The FTIR characterization of three types of pollutants.

\* Corresponding author

E-mail: [chenxinyue888@126.com](mailto:chenxinyue888@126.com), Tel: +86-15293109642

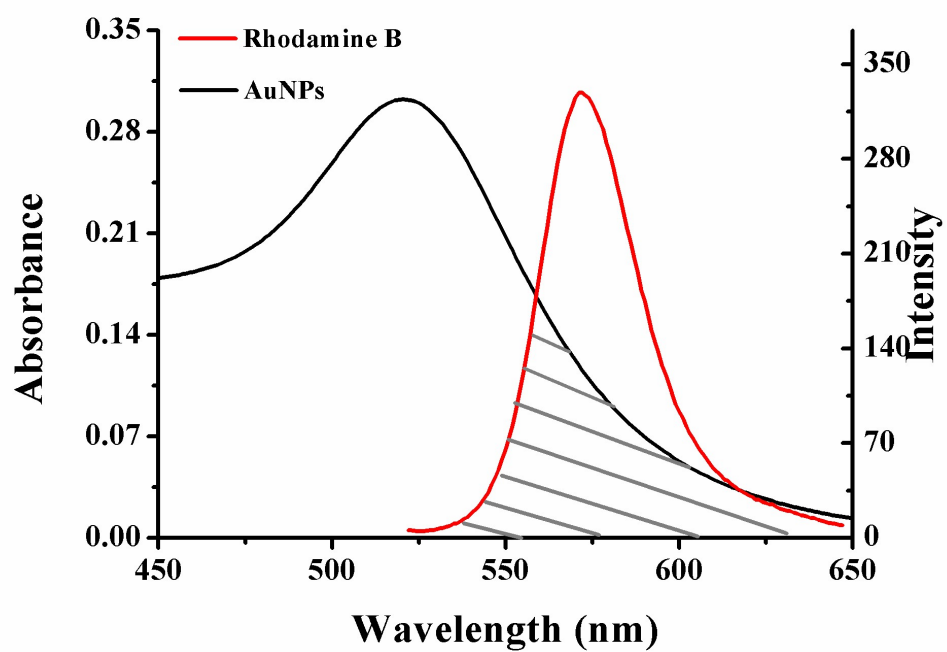

Figure S2. Fluorescence spectra of Rhodamine B solution and UV-Vis absorption spectra of AuNPs.

Table S1. Comparison of different detection methods of streptomycin.

| Various detection methods                                                                 | Linear range            | LOD                | Ref.               |
|-------------------------------------------------------------------------------------------|-------------------------|--------------------|--------------------|
| Peroxidase-mimicking catalytic activity of gold nanoparticles                             | 0.1-0.5 $\mu\text{M}$   | 86 nM              | 2017 <sup>23</sup> |
| Streptomycin-specific single-stranded DNA aptamers                                        | 0.2-1.2 $\mu\text{M}$   | 200 nM             | 2013 <sup>48</sup> |
| Colorimetric and fluorescence quenching aptasensors                                       | 0-4 $\mu\text{M}$       | 73.1 nM<br>47.6 nM | 2016 <sup>21</sup> |
| An electrochemical aptasensor                                                             | 30-1.5 $\mu\text{M}$    | 11.4 nM            | 2015 <sup>22</sup> |
| Label-free fluorescent aptasensor                                                         | 0-2 $\mu\text{M}$       | 54.5 nM            | 2016 <sup>17</sup> |
| Self-Assembled Microgels                                                                  | 0.05-100 ng/ml          | 1.7 pg/ml          | 2019 <sup>19</sup> |
| An electrochemical aptasensor                                                             | 0.05-200 ng/ml          | 0.028 ng/ml        | 2017 <sup>49</sup> |
| Photoelectrochemical aptasensor based on CdTe quantum dots-single walled carbon nanohorns | 0.1-50 nM               | 0.033 nM           | 2017 <sup>26</sup> |
| An electrochemical aptasensor                                                             | 0.1-700 pg/ml           | 0.033 pg/ml        | 2018 <sup>16</sup> |
| A photoelectrochemical aptasensor                                                         | 0.05-150 nM             | 0.04 nM            | 2020 <sup>50</sup> |
| Fluorescence colorimetric sensor                                                          | 5 nM-1.25 $\mu\text{M}$ | 1.12 nM            | This work          |

Table S2. Comparison of different detection methods of benzidine.

| Various detection methods                                                 | Linear range            | LOD                  | Ref.              |
|---------------------------------------------------------------------------|-------------------------|----------------------|-------------------|
| Thin-layer chromatography combined with surface-enhanced raman scattering | 1-15 $\mu\text{g/L}$    | 0.23 $\mu\text{g/L}$ | 2020 <sup>1</sup> |
| Durian-like multi-functional $\text{Fe}_3\text{O}_4$ -Au nanoparticles    | -                       | 1 $\mu\text{M}$      | 2013 <sup>4</sup> |
| Platinum-Based and carbon-based screen-Printed Electrodes                 | 60 nM-250 $\mu\text{M}$ | 1.2 nM               | 2012 <sup>3</sup> |
| Fluorescence colorimetric sensor                                          | 2.5-15 $\mu\text{M}$    | 56.52 nM             | This work         |

Table S3. A series of pesticides which were commonly used in most of crops to investigate the selectivity of cyromazine.

| Pesticides |                    |                          |                                                                                      |                                     |
|------------|--------------------|--------------------------|--------------------------------------------------------------------------------------|-------------------------------------|
| 1          | propiconazole      | $C_{16}H_{22}ClN_3O$     | 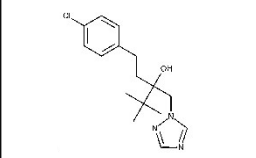   | triazole bactericidal pesticides    |
| 2          | phosalone          | $C_{12}H_{15}ClNO_4PS_2$ |    | phosphate dithioesters pesticides   |
| 3          | imidacloprid       | $C_9H_{10}ClN_5O_2$      |    | nitro methylene systemic pesticides |
| 4          | tolclofos-methyl   | $C_9H_{11}Cl_2O_3PS$     |   | organophosphorus pesticides         |
| 5          | azamethiphos       | $C_9H_{10}ClN_2O_5PS$    |  | organophosphorus pesticides         |
| 6          | diazinon           | $C_{12}H_{21}N_2O_3PS$   |  | organophosphorus pesticides         |
| 7          | isazofos           | $C_9H_{17}ClN_3O_3PS$    |  | organophosphorus pesticides         |
| 8          | chlorpyrifos-metho | $C_7H_7Cl_3NO_3PS$       |  | organophosphorus pesticides         |
| 9          | formothion         | $C_6H_{12}NO_4PS_2$      |  | organophosphorus pesticides         |
| 10         | cyromazine         | $C_6H_{10}N_6$           |  | triazine insect growth regulator    |

|    |              |                      |                                                                                                                                                                                                                                                                                                                                                                                                                           |                                |
|----|--------------|----------------------|---------------------------------------------------------------------------------------------------------------------------------------------------------------------------------------------------------------------------------------------------------------------------------------------------------------------------------------------------------------------------------------------------------------------------|--------------------------------|
| 11 | thiamethoxam | $C_8H_{10}ClN_5O_3S$ | 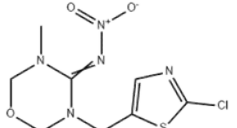 <p>The chemical structure of thiamethoxam consists of a 6-membered 1,3-oxazine ring with a methyl group on the nitrogen at position 2. This ring is connected at position 4 to a 5-membered thiazole ring, which has a chlorine atom at position 4. A nitro group (-NO<sub>2</sub>) is attached to the thiazole ring at position 2.</p> | organophosphorus<br>pesticides |
|----|--------------|----------------------|---------------------------------------------------------------------------------------------------------------------------------------------------------------------------------------------------------------------------------------------------------------------------------------------------------------------------------------------------------------------------------------------------------------------------|--------------------------------|

Table S4. Various antibiotics which were common broad-spectrum antimicrobials to investigate the selectivity of streptomycin.

| Antibiotics |                            |                         |                                                                                      |                                           |
|-------------|----------------------------|-------------------------|--------------------------------------------------------------------------------------|-------------------------------------------|
| 1           | streptomycin               | $C_{21}H_{39}N_7O_{12}$ | 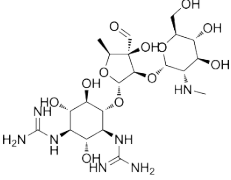   | aminoglycoside antibiotics                |
| 2           | ofloxacin                  | $C_{18}H_{20}FN_3O_4$   |     | fluoroquinolone antimicrobials            |
| 3           | amoxicillin                | $C_{16}H_{19}N_3O_5S$   |     | $\beta$ -lactam antibiotics               |
| 4           | erythrocin                 | $C_{37}H_{67}NO_{13}$   |     | macrolide antibiotics                     |
| 5           | clarithromycin             | $C_{38}H_{69}NO_{13}$   |   | macrolide antibiotics                     |
| 6           | ampicillin                 | $C_{16}H_{19}N_3O_4S$   |   | $\beta$ -lactam antibiotics               |
| 7           | benzylpenicillin potassium | $C_{16}H_{17}KN_2O_4S$  |   | $\beta$ -lactam antibiotics               |
| 8           | roxithromycin              | $C_{41}H_{76}N_2O_{15}$ |   | macrolide antibiotics                     |
| 9           | norfloxacin                | $C_{16}H_{18}FN_3O_3$   |  | third-generation quinolone antimicrobials |

|    |               |                     |                                                                                                                                                                                                                                                                                                                                                                                                    |                                           |
|----|---------------|---------------------|----------------------------------------------------------------------------------------------------------------------------------------------------------------------------------------------------------------------------------------------------------------------------------------------------------------------------------------------------------------------------------------------------|-------------------------------------------|
| 10 | ciprofloxacin | $C_{17}H_{18}FN_3O$ | 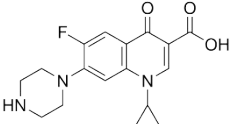 <p>The chemical structure of ciprofloxacin is a quinolone derivative. It features a central quinolone ring system. At position 6, there is a piperazine ring. At position 7, there is a fluorine atom. At position 8, there is a cyclopropyl ring. At position 4, there is a carboxylic acid group (-COOH).</p> | third-generation quinolone antimicrobials |
|----|---------------|---------------------|----------------------------------------------------------------------------------------------------------------------------------------------------------------------------------------------------------------------------------------------------------------------------------------------------------------------------------------------------------------------------------------------------|-------------------------------------------|



Table S5. A series of chemical reagents with similar structure to investigate the selectivity of benzidine.

| Chemical agents |                                            |                    |                                                                                      |                                           |
|-----------------|--------------------------------------------|--------------------|--------------------------------------------------------------------------------------|-------------------------------------------|
| 1               | acetaminophen                              | $C_8H_9NO_2$       | 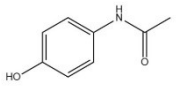   | acetanilide compounds                     |
| 2               | dimethylaminobenzaldehyde                  | $C_9H_{11}NO$      |    | amino benzaldehyde compounds              |
| 3               | salicylic acid                             | $C_7H_6O_3$        |    | benzoic acid compounds                    |
| 4               | para aminobenzoic acid                     | $C_7H_7NO_2$       |   | aminobenzoic acid compounds               |
| 5               | phenol                                     | $C_6H_6O$          |  | phenolic compounds                        |
| 6               | naphthalene                                | $C_{10}H_8$        |  | polycyclic aromatic hydrocarbon compounds |
| 7               | 5-methyl-2-phenyl-1,2-dihydropyrazol-3-one | $C_{10}H_{10}N_2O$ |  | phenylpyrroles                            |
| 8               | benzidine                                  | $C_{12}H_{12}N_2$  |  | aromatic diamine compounds                |
